# Supplementary material for: Interpreting the clinical significance of multiple large-scale mitochondrial DNA deletions (MLSMD) in skeletal muscle tissue in the diagnostic evaluation of primary mitochondrial disease
Source: Front Pharmacol. 2025 Apr 9;16:1507493. doi: 10.3389/fphar.2025.1507493 (PMC12015102; doi:10.3389/fphar.2025.1507493)
Supplement: Supplementary file 1 [file Table1.xlsx]

## Sheet: S1
Table S1. Summary of clinical, muscle biopsy and laboratory test results in 50 subjects with MLSMD
Subject #	Age at Clinic Evaluation (y)	Age at Muscle Biopsy	Age Difference	Heteroplasmy Level (%)	mtDNA Variants	mtDNA Content	ETC Enzyme Activity	CS level	Clinical Classification Group	Ptosis or PEO: 0=No, 1=yes.	WES performed? 0=No, 1=yes.	WGS Performed? 0=No, 1=yes.	CK (U/L)	CK 0 = <300 U/L, 1 = >300 U/L	GDF15 (pg/mL; <750 pg/mL is normal)	Nml GDF15 = 0 , Nominal elevation = 1, >1200pg/mL = 2	Baseline Serum Lactate (mM)	RRFs: 0=No, 1=yes.	RBFs: 0=No, 1=yes.	COX-: 0=No, 1=yes.	Increased subsarcolemmal staining/accumulation 0 = no, 1 = yes	Type I Fiber Predominance	Type II Fiber Predominance	Type I Fiber Grouping	Type II Fiber Grouping	Variation in Fiber Size	Internally placed nuclei	Nuclear Bags	Fiber Degeneration and Regeneration	Perivascular Inflammation	Clinical Features
1	29.3	29.3	0	0.33	MT-TC m.5777G>A 7.8%, MT-ATP6 m.9133G>A 97.1%, MT-ND4 m.10863G>A 17.9% VUSs	NA	NA	NA	Genetic Dx	1	1	0	161	0	NA	NA	5.6	NA	NA	NA	NA	NA	NA	NA	NA	NA	NA	NA	NA	NA	Ptosis, ophtalmoplegia, lactic acidosis, muscle weakness, End stage mitochondrial cardiomyopathy and heart transplantation
2	77.7	76.3	1.4	0.24		NA	NA	NA	I	1	1	0	449	1	3138	2	1.67	1	0	1	0	0	0	0	0	1	1	0	0	0	Ptosis without ophthalmoplegia, diabetes, muscle weakness, imbalance, increased serum CK, increased alanine, hypothyroidism
3	76.6	76.5	0.1	0.19		NA	upregulated >150%	unremarkable	I	1	1	0	104	0	3206	2	2.92	1	1	1	1	0	1	0	0	1	1	1	1	0	CPEO since 50s, ptosis, dyspnea, exercise intolerance, myopathy, dysphagia, hearing loss, increased pyruvate, increased lactate, tremors, memory difficulties
4	44.1	43.8	0.3	0.13	MT-TL m.3243A>G 42.4 in muscle, 14% in blood	NA	NA	NA	Genetic Dx	1	0	0	123	0	NA	NA	NA	1	0	1	1	0	0	0	0	1	0	0	0	0	Exercise intolerance, Ptosis (since age 17), PEO, weakness, and reduced VO2 max and anerobic threshold
5	12	11.9	0.1	0.13	m.3253 T>C homoplasmic, present in unaffected mat grandmother at homoplasmy, LBEN	Proliferated	upregulated >150%	unremarkable	I	1	1	1	1176	1	4558	2	12.3	1	1	1	1	No comment	No comment	No comment	No comment	1	1	0	1	0	HyperCKemia, Chronically elevated lactate, fatigue, muscle weakness, ptosis without ophthalmoplegia, unilateral optic atrophy, short stature, developmental delay, migraine, scoliosis
6	66.1	63.7	2.4	0.12		NA	upregulated >150%	reduced CS	II	1	1	0	82	0	NA	NA	NA	0	M	1	0	0	0	1	1	1	0	0	1	0	Ptosis without ophthalmoplegia, progressive fatigue, proximal muscle weakness, pain, diplopia, dysphagia, poor balance, vomiting
7	71.2	71	0.2	0.12		Unremarkable	upregulated >150%	reduced CS	II	1	1	1	107	0	1168	1	0.96	0	0	1	0	0	0	0	0	1	0	0	0	0	Ptosis without ophthalmoplegia, fatigue, exercise intolerance, dyspnea, myalgia, hypogonadism, migraine, irritable bowel disease, hashimotos thyroidits
8	63.7	63.5	0.2	0.1	No mtDNA variants, but Myotonic Dystrophy type 2 (CNBP repeat testing sent > 75 CCTG repeats)	Depletion	upregulated >150%	unremarkable	Genetic Dx	0	1	0	181	0	629	0	1.14	1	0	1	0	1	0	1	1	1	1	1	0	0	Myotonic Dystrophy type 2 + hearing loss and optic trophy
9	67.4	66.9	0.5	0.08		NA	upregulated >150%	reduced CS	II	0	1	0	50	0	913	1	0.61	0	0	1	1	0	0	not specified	Not specified	0	0	1	0	0	Myalgias, exercise intolerance, SNHL, memory difficulties, urinary incontinence, skin rash
10	78.5	78.2	0.3	0.08	MT-RNR2 m.2593G>A 1.7% VUS	NA	NA	NA	II	1	1	0	233	0	1147	1	1.9	0	0	1	0	0	1	1	1	1	0	0	0	0	Ptosis without ophthalmoplegia, Rapidly progressive exercise intolerance, dyspnea, hearing loss, cataracts, hypogonadism, diabetes, cognitive decline
11	19.7	16.8	2.9	0.08	m.1555A>G 3.9% P; m.4450G>A 4.4% P	Reduced	upregulated >150%	reduced CS	III	1	1	0	111	0	783	1	1.56	0	0	0	0	0	0	0	0	0	0	0	0	0	GI issues including cyclic vomiting, ptosis without ophthalmoplegia, chronic nausea, chronic abdominal pain, EoE; fatigue, delayed processing, hypersomnolence, episodic rhabdomyolysis, ptosis (L>>R); EDS, POTS, dysautonomia, MCAS, headache,	"Rhabdo" - does not have CK level in chart, parental report admitted OSH
12	15.4	15.3	0.1	0.07		Unremarkable	upregulated >150%	unremarkable	III	0	1	1	690	1	NA	NA	1.38	0	0	0	1	0	0	1	1	1	1	0	0	0	Developmental Delay, muscle weakness, abnormal gait, autism, hearing loss conductive v SNHL?, increased serum CK, skin rash
13	64	63.9	0.1	0.06		Unremarkable	upregulated >150%	reduced CS	II	1	1	0	57	0	1831	2	1.69	0	0	1	0	0	0	0	1	0	0	0	0	0	Ptosis without ophthalmoplegia, muscle weakness, hearing loss, exercise intolerance, paresthesias, diabetes, hypothyoridism, dermatomyositis, and fatty liver
14	47	46.8	0.2	0.06		Reduced	upregulated >150%	reduced CS	III	0	1	0	225	0	606	0	1.3	0	0	0	0	0	0	0	0	1	0	0	0	0	Fatigue, exercise intolerance, dysesthesia, brain fog, headaches, myalgias, POTS, dysautonomia, ?Mast Cell? idiopathic intracranial hypertension
15	51.4	42.3	9.1	0.05	MT-ND1 m.3316G>C at 38.8% in muscle	Unremarkable	upregulated >150%	unremarkable	I	0	1	0	155	0	449	0	0.61	0	0	1	1	1	0	0	0	1	0	0	0	0	Fatigue, pain, myalgias, exercise intolerance, migraine, memory difficulties, imbalance, dysautonomia, POTS, paresthesias
16	71	70.5	0.5	0.04		NA	NA	NA	II	0	1	0	130	0	748	0	0.93	M	M	M	M	M	M	M	M	M	M	M	M	M	Muscle pain, hypertension, brain fog, history of developmental delay, Raynauds
17	68.9	68.7	0.2	0.04		NA	upregulated >150%	reduced CS	I	1	1	0	49	0	772	1	0.92	0	0	1	0	1	0	1	1	1	0	0	0	0	Ataxia, dysphonia, CPEO, muscle weakness, muscle bulk and atrophy, hyperreflexia, hypothyroidism, dysphagia, cognitive decline
18	47.2	47.2	0	0.03		NA	upregulated >150%	reduced CS	III	0	1	0	71	0	NA	NA	0.73	0	0	0	1	0	0	0	0	1	1	0	0	0	Fatigue, exercise intolerance, hypogonadism, headaches, dizziness
19	42	41.9	0.1	0.03		Unremarkable	upregulated >150%	reduced CS	III	0	1	1	84	0	463	0	0.79	0	0	0	0	0	0	0	0	0	0	0	0	0	Fatigue, exercise intolerance, mylagias, paresthesias, bowel and bladder involvement, urine incontinence, cataract, rosacea, vertigo
20	41.3	41.1	0.2	0.03	MT-ATP6 m.9160T>C 4% in buccal, 9.5% in muscle	Unremarkable	NA	NA	III	1	1	1	210	0	853	1	1.23	1	0	0	1	0	1	0	0	1	0	0	0	0	Ptosis without ophthalmoplegia, optic atrophy, worsening muscle spasms, muscle weakness, myoclonic seizure like episodes, neuropathy, cognitive decline, hearing loss, dyspnea on exertion, diabetes, transverse myelitis and osteomyletitis, increased serum pyruvate
21	68.7	68.4	0.3	0.03		NA	upregulated >150%	reduced CS	II	0	1	1	124	0	899	1	2.39	0	0	1	0	0	1	0	0	1	0	0	0	0	Myalgias, exercise intolerance, imbalance, small fiber neuropathy, cognitive deficits, dysautonomia, cataracts (50s), GI dysmotlity
22	30.2	30.2	0	0.03		Reduced	upregulated >150%	reduced CS	III	0	1	1	43	0	721	0	1.1	0	0	0	0	0	1	0	0	0	0	0	0	0	EDS, POTS, Mast Cell; Exercise intolerance and fatigue, GI pseudo-obstruction with previous h/oTPN dependency, EDS hypermobility (with right shoulder subluxations s/p surgical intervention), migraines/chronic headaches, adrenal insufficiency, immunodeficiency, glaucoma, muscle pain, muscle spasms, bloating/nausea, hypersomnolence/fatigue
23	15.5	14.2	1.3	0.03	MT-CYB m.15243G>A at 26% in muscle, 5% in buccal, 14% in urine,16% in blood; not in mother's urine and buccal. LP	Unremarkable	upregulated >150%	unremarkable	I	0	1	1	240	0	373	0	1.49	0	0	0	0	0	0	0	0	0	0	0	0	0	autism, hypotonia, fatigue, GI dysmotility, diarrhea alt w constipation, now with weight loss, hyponatremia of unknown etiology, urinary incontinence/frequency/small bladder capacity; adrenal insufficiency (on cortef); abnl EEG w/ESES-like pattern; EoE; short stature on hGH deficiency; worsening anxiety and agitation (pacing, improved); heat intolerance, elevated testosterone
24	9.1	9	0.1	0.03	MT-ND5 m.13154T>C 8.8% in blood, 3.4% in muscle	NA	NA	NA	III	0	1	0	20	0	NA	NA	1.8	M	M	M	M	M	M	M	M	M	M	M	M	M	Developmental regression, seizures, concern for Moya Moya, dysphagia, lymphatic disorder
25	45.5	45.3	0.2	0.02		Unremarkable	upregulated >150%	unremarkable	III	0	1	0	74	0	501	0	0.72	0	0	0	0	0	0	0	0	0	0	0	0	0	Seizures, Dysautonomia, POTS, imbalance, GI dysmotility, muscle fatigue, exercise intolerance, frequent infections
26	39.1	39	0.1	0.02	MT-TL m.3243A>G 12% in urine, 3% in buccal	NA	NA	NA	I	1	1	0	70	0	1568	2	2.1	1	0	0	0	0	0	0	0	1	1	0	0	0	Stroke-like episodes, Ptosis without ophthalmoplegia, muscle weakness, fatigue, exercise intolerance, GI dysmotility, palpitations and SVT, vertigo
27	43.8	43.6	0.2	0.02	MT-CO3 m.9753G>C homoplasmic VUS	NA	upregulated >150%	reduced CS	III	1	1	0	229	0	NA	0	0.7	0	0	0	0	0	1	0	0	1	1	0	0	0	Fatigue, dyspnea, Ptosis without ophthalmoplegia, sero negative rheumatoid arthritis, POTS, vomiting nausea
28	51.7	51.2	0.5	0.02		Unremarkable	upregulated >150%	unremarkable	I	0	1	0	2146	1	NA	NA	NA	0	0	0	1	0	0	0	0	1	1	0	0	0	Fatigue, exercise intolerance, inceased serum CK, muscle cramping, dyspnea, GI dysmotility, brain fog
29	49.8	49	0.8	0.01		NA	NA	NA	III	0	NA	NA	NA	NA	NA	NA	NA	M	M	M	M	M	M	M	M	M	M	M	M	M	Viral encephalitis, cerebral anginitis, mitocondrial disease, and recurring seizures FLAIR hyperintensity
30	12.2	9.6	2.6	0.01		Unremarkable	Unremarkable	unremarkable	III	0	1	pending	96	0	375	0	1.2	0	0	0	0	0	0	0	0	1	0	0	0	0	Exercise intolerance, muscle weakness, fatigue, developmental delay, regression, poor sleep, headaches, history of seizures, SNHL, hereditary spherocytosis, recurrent sinus infections, hypogammaglobulinemia, eosinophilic esophagitis
31	41	40.6	0.4	0.01		Proliferated	upregulated >150%	reduced CS	III	1	1	0	44	0	NA	NA	1.05	0	0	0	0	0	1	0	0	0	0	0	0	0	Ptosis without ophthalmoplegia, fatigue, mylagias, ataxic gait, memory difficulties, migraines, weakness, hypermobile EDS
32	44	43.7	0.3	0.01	MT-TP m.15959G>A 48% in muscle 38% in urine, neg in blood and buccal, de novo	Unremarkable	Unremarkable	unremarkable	Genetic Dx	1	1	0	NA	NA	NA	NA	2.31	1	1	1	0	0	1	0	0	1	1	1	1	0	CPEO, pigmentary retinopathy, cataracts, exercise intolerance
33	39.7	39.3	0.4	0.01	MT-TP m.15987C>T 1.7% in muscle, 8% in blood, 11% in saliva.	NA	upregulated >150%	reduced CS	III	0	1	0	133	0	NA	NA	0.6	M	M	M	M	M	M	M	M	M	M	M	M	M	Myalagias, muscle cramps, weakness, spasticity with dystonic episodes, POTS, dysautonomia, neurogenic bladder, TPN dependence, and GI dysmotility with G and J tubes
34	45.9	45.6	0.3	0.01	MT-CO1 m.6021G>C 1.7% VUS	Unremarkable	Unremarkable	unremarkable	III	0	0	1	36	0	1773	2	0.6	0	0	1	0	0	1	0	0	1	0	0	0	0	Episodic weakness, allodynia, POTS, brain fog, migraine, neuropathy, borderline diabetes
35	51.2	50.7	0.5	0.01		Unremarkable	Unremarkable	unremarkable	II	0	1	0	121	0	NA	NA	0.2	0	0	1	0	0	0	0	0	0	0	0	0	0	Chronic fatigue, diabetes, Graves disease, Fibromyalgia, muscle cramps, PVCs, cardiac dysrhythmia, migraines, dyspnea
36	21.2	21.2	0	0	MT-ND1 m.3395A>G LP at 100%	Unremarkable	upregulated >150%	reduced CS	I	0	1	1	45	0	402	0	1.01	0	0	0	1	0	1	0	0	0	0	0	0	0	Bilateral optic atrophy, vision loss, myoclonic epilepsy, migraines, episodic hypoglycemia, palpitations
37	67	66.9	0.1	0		NA	upregulated >150%	reduced CS	II	1	1	0	73	0	1082	1	1.86	0	0	1	0	0	1	0	0	1	1	1	0	0	Ptosis without ophthalmoplegia, weakness, exercise intolerance, dysphagia, gastroparesis, protein losing enteropathy, coronary artery by pass s/p pacemaker
38	50.7	50.6	0.1	0	MT-TL m.3243A>G 7.1% in muscle, 1.5% in urine, not in buccal and blood	Unremarkable	upregulated >150%	unremarkable	II	0	1	0	82	0	507	0	0.53	0	0	0	1	0	1	0	0	1	0	0	0	0	GI dysmotility, exercise intolerance, fatigue, anxiety, urinary incontinence, migraines
39	47.6	47	0.6	0		Unremarkable	upregulated >150%	unremarkable	III	0	0	0	59	0	NA	NA	1.1	0	0	1	0	0	1	0	0	0	0	0	0	0	Fatigue, muscle weakness, exercise intolerance, pain, numbness, poor short term memory
40	38.1	38	0.1	0		NA	NA	NA	III	0	1	0	112	0	NA	NA	NA	0	0	0	0	0	0	0	0	0	0	0	0	0	Optic atrophy, muscle cramps, headaches, abdominal pain, h/x thrombotic thrombocytic purpura
41	47.3	41.8	5.5	0		Depletion	upregulated >150%	reduced CS	III	1	1	1	72	0	421	0	0.63	0	0	0	1	0	0	0	0	0	0	0	0	0	Fatigue, fibromylagia, exercise intolerance, ptosis without ophthalmoplegia, POTS, dysautonomia, IBS, brain fog
42	13	12.6	0.4	0		Depletion	upregulated >150%	reduced CS	I	0	1	0	2351	1	4006	2	0.8	M	M	M	M	M	M	M	M	M	M	M	M	M	Muscle cramps, muscle weakness, elevated CK, dysautonomia, failure to thrive, pseudo-obstruction, intestinal dysmotility, TPN -dependent, pancreatitis, respiratory insufficiency, optic atrophy, history of liver failure, renal tubular acidosis
43	65.5	65	0.5	0	MT-ND6 m.14339A>T homoplasmic VUS, homoplasmic in mom	Depletion	Complex IV deficiency	unremarkable	I	0	1	0	125	0	1091	1	0.8	1	0	1	1	1	0	1	1	1	1	1	0	0	Lupus erythematosus, fatigue, weakness, cramps, spasms, neurogenic bladder, SNHL, history of seizures, cognitive decline, imbalance, dyspnea, neuropathy
44	25.1	24	1.1	0	MT-TT m.15888G>A 86.8% muscle	Unremarkable	Unremarkable	unremarkable	Genetic Dx	0	1	0	125	0	>6000	2	20	1	0	1	1	1	0	0	0	1	1	0	1	0	Muscle fatigue, exercise intolerance, gastroparesis, refractory lactic acidosis,
45	16.3	16.3	0	0	MT-TE m.14700C>T 8.6% VUS	Proliferated	upregulated >150%	unremarkable	III	0	1	1	1554	1	301	0	0.85	0	0	0	1	1	0	0	0	1	0	0	0	0	Increased serum CK muscle pain, muscle fatigue, headaches , abdominal pain, nausea, vomiting
46	53.4	52.8	0.6	0		Unremarkable	upregulated >150%	reduced CS	II	1	1	1	88	0	1164	1	1.22	0	0	0	0	0	1	0	0	0 - very mild	0	0	0	0	Hypertensive crises, ptosis without ophthalmoplegia, fatigue, muscle pain, norcirrhotic liver steatosis, hepatic ademona, vomiting, abdominal pain, constipation, hypoglycemia, Still's disease
47	46.1	46	0.1	0	MT-TV m. 1641G>A 1.1% VUS	Unremarkable	Unremarkable	unremarkable	III	0	1	1	114	0	364	0	1.7	0	0	0	0	0	0	0	0	0- very mild	0	0	0	0	exercise intolerance, GI dysmotlity, first degree AV block, psoriasis, learning disability, paresthesias, dysautonomia, POTS
48	46.8	45.8	1	0		Unremarkable	upregulated >150%	unremarkable	III	1	1	0	107	0	1027	1	2.08	0	0	1	0	0	1	0	1	1	0	0	0	0	Ptosis without ophthalmoplegia, shortness of breath, migraine, fatigue, exercise intolerance, GI dysmotility, dysautonomia, POTS
49	38.9	35.2	3.7	0		NA	NA	NA	I	0	1	1	NA	NA	NA	NA	2	0	0	0	0	0	0	0	0	0	0	0	0	0	Demyelinating polyneuropathy, white matter disease, premature ovarian failure, optic neuropathy, elevated CSF lactate, alanine, and protein
50	56.7	54.3	2.4	0	MT-ND4 m.10863G>A 1.8% muscle	NA	NA	NA	I	1	1	0	149	0	620	0	0.9	0	0	0	1	0	1	0	0	1	0	0	0	0	Ptosis without ophthalmoplegia, exercise intolerance, weakness, fatigue, dysphagia, dysphonia, cardiac arrhythmia (first degree AV block), dysautonomia, chronic kidney disease, Hashimotos hypothyroidism

## Sheet: S2
Table S2. 10 subjects with definitive genetic etiologies, including 4 subjects with PMD (Subjects 1, 2, 32 and 44) and 1 subject with DM2 (Subject 8) in the MLSMD group and 5 subjects in the non-MLSMD cohort (Subjects 51-55)
Subject #	MLSMD Heteroplasmy Level (%)	mtDNA sequencing results	WES results	Clinical indication
1	0.33	Unremarkable	C1QBP c.612C>G (p.F204L)/exon 4-6 deletion (in trans)	mitochondrial cardiomyopathy and heart transplantation
4	0.13	MT-TL m.3243A>G 42.4 in muscle, 14% in blood	Non-diagnostic	Exercise intolerance, Ptosis (since age 17), PEO, weakness, and reduced VO2 max and anerobic threshold
8	0.1	Unremarkable	Non-diagnostic	Confirmed myotonic dystrophy type 2 with 1 allele of CNBP > 75 CCTG repeats
32	0.01	MT-TP m.15959G>A 48% in muscle 38% in urine, neg in blood and buccal, de novo	Negative	CPEO, pigmentary retinopathy, cataracts, exercise intolerance
44	0	MT-TT m.15888G>A 86.8% in muscle, 9% blood, 17% urine, de novo	Non-diagnostic	Fatigue, exercise intolerance, refractory lactic acidosis,
51	Negative	MT-TL 3243A>G 68% in muscle	Non-diagnostic	MELAS
52	Negative	MT-TL1 m.3303C>T 94.4% in muscle	Negative	Exercise intolerance, muscle fatigue, muscle cramps.
53	Negative	Negative	POLG p. W748S and p. R807C (in trans)	Signficiant histological artifact; Deceased at 4 yrs w Alpers syndrome
54	Negative	Negative	MECR c.830+2dup + c.695G>A; p.Gly232Glu (in trans)	Developmental delay, ataxia, abnormal brain MRI
55	Negative	Negative	AFG3L2 (AD) c.571G>A (p.V191I)	Imbalance, slowly progressive gait and limb ataxia, dysarthria, hyperreflexia, nystagmus, ophthalmoplegia, and ptosis, cognitive difficulties
